# Supplementary material
Source: publisher site journal article supplement (https://www.dovepress.com/article/554870)
Supplement: Supplementary file 1 [file 554870_Appendix%201%20%20Tables%20and%20Questionnaire%20Final%2020.1.25.docx]

**Appendix 1**

**Tables of results for men in the screening programme combined with supporters**

**Table S1 Percentage of men and supporters answering knowledge questions correctly (N=30 men, N=36 men and supporters)**

| Questions asked | Pre-deliberation | | Post-deliberation | | | Change (based on those who completed both pre and post deliberation) | | |
| --- | --- | --- | --- | --- | --- | --- | --- | --- |
|  | Men  N (%) | Men and Supporters  N (%) | | Men  N (%) | Men and Supporters  N (%) | | Men  N (%) | Men and Supporters  N (%) |
| Q1 What is AAA | 16 (53%) | 18 (50%) | | 23 (77%) | 29 (80%) | | 7 (24%)+ | 9 (25%)+ |
| Q2 Diameter of a normal AAA | 23 (77%) | 29 (80%) | | 26 (87%) | 32 (89%) | | 3 (10%) | 3 (8%) |
| Q3 Definition of a small AAA | 16 (53%) | 19 (53%) | | 19 (63%) | 21 (58%) | | 3 (10%) | 3 (8%) |
| Q4 Definition of a medium AAA | 13 (43%) | 14 (39%) | | 20 (67%) | 23 (64%) | | 7 (24%)+ | 9 (25%)+ |
| Q5 Who screening is offered to | 6 (20%) | 8 (22%) | | 6 (20%) | 8 (22%) | | 0 ( 0%) | 0 (0%) |
| Q6 Frequency of scanning for small AAA | 24 (80%) | 29 (80%) | | 29 (97%) | 35 (97%) | | 5 (17%) | 6 (17%) |
| Q7 Frequency of scanning for medium AAA | 5 (17%) | 5 (14%) | | 18 (60%) | 19 (53%) | | 13 (43%)+ | 14 (39%)+ |
| Q8 How is screening carried out | 29 (97%) | 33 (92%) | | 30 (100%) | 36 (100%) | | 1 (3%) | 3 (8%) |
| Q9 Exiting surveillance | 2 (7%) | 2 (6%) | | 30 (100%) | 34 (94%) | | 28 (93%)+ | 32 (89%)+ |
| Q10 Plan when AAA becomes large | 21 (70%) | 23 (64%) | | 30 (100%) | 35 (97%) | | 9 (30%)+ | 10 (28%)+ |
| Q11 Reason for surveillance rather than surgery | 24 (80%) | 28 (78%) | | 24 (80%) | 29 (80%) | | 0 (0%) | 1 (3%) |

+p<0.05 McNemar’s test

**Table S2 (a) Percentage of men finding sources of information about AAA helpful pre-deliberation (N=30 men)**

|  | Extremely helpful | Very helpful | Slightly helpful | Not at all helpful | Not used this |
| --- | --- | --- | --- | --- | --- |
| Written information like leaflets | 9 (30%) | 12 (40%) | 8 (27%) | 0 (0%) | 1 ( 3%) |
| Online information like websites | 4 (13%) | 6 (20%) | 6 (20%) | 1 (3%) | 13 (43%) |
| Discussions with health care staff | 12 (40%) | 9 (30%) | 6 (20%) | 0 (0%) | 3 (10%) |

**Table S2(b) Percentage of men and supporter finding sources of information about AAA helpful pre-deliberation**

**(N=36 men and supporters)**

|  | Extremely helpful | Very helpful | Slightly helpful | Not at all helpful | Not used this |
| --- | --- | --- | --- | --- | --- |
| Written information like leaflets | 12 (33%) | 15 (42%) | 8 (22%) | 0 (0%) | 1 (3%) |
| Online information like websites | 6 (17%) | 6 (17%) | 8 (22%) | 1 (3%) | 15 (42%) |
| Discussions with health care staff | 14 (39%) | 9 (25%) | 11 (31%) | 0 (0%) | 5 (14%) |

**Table S3 Percentage of men rating factors extremely or very important pre- and post-deliberation (N=30 men) (N=36 men and supporters)**

| Factor | Pre-deliberation  Men  N % | Pre-deliberation  Men and Supporters  N % | Post-deliberation  Men  N % | Post-deliberation  Men and Supporters  N % |
| --- | --- | --- | --- | --- |
| Rate of growth of AAA | 30 (100%) | 35 (97%) | 30 (100%) | 36 (100%) |
| Size of AAA | 29 (97%) | 35 (97%) | 30 (100%) | 36 (100%) |
| Health issues that may make surgery risky | 27 (90%) | 33 (97%) | 28 (93%) | 34 (94%) |
| The views of healthcare professionals | 27 (90%) | 32 (89%) | 28 (93%) | 34 (94%) |
| What people and their family prefer | 20 (67%) | 24 (67%) | 22 (73%) | 28 (78%) |
| Reassurance provided by a scan | 27 (90%) | 31 (86%) | 26 (87%) | 30 (83%) |
| Number of years in surveillance | 16 (53%) | 20 (56%) | 12 (40%) | 14 (39%) |
| Age | 16 (53%) | 17 (47%) | 9 (30%) | 14 (39%) |
| Difficulty attending for scans | 7 (23%) | 11 (31%) | 7 (23%) | 8 (22%) |
| Cost to the NHS | 7 (23%) | 9 (25%) | 7 (23%) | 8 (22%) |
| Worry caused by being in surveillance | 7 (23%) | 8 (22%) | 6 (20%) | 9 (25%) |

**Table S4 Percentage of men and supporters rating exit strategies very acceptable or acceptable ( Men N=30) (Men and Supporters N=36)**

|  | Exit Strategy (Short description) | Pre-deliberation  Men  N (%) | Pre-deliberative  Men and Supporters  N (%) | Post-deliberation  Men  N (%) | Post-deliberation  Men and Supporters  N ( %) |
| --- | --- | --- | --- | --- | --- |
| ES9 | If, after 5 years in surveillance, a man’s AAA is not growing or is growing very slowly, he can choose to have a longer interval between scans (for example, have a scan every 2 years). However, if the rate of growth of his AAA increases, he can return to having more regular scans | 27 (90%) | 33 (92%) | 27 (90%) | 35 (97%) |
| ES7 | If a man’s health becomes worse while in surveillance, this will trigger a discussion with a specialist nurse about whether it is appropriate for him to continue in surveillance | 24 (80%) | 25 (69%) | 25 (83%) | 29 (81%) |
| ES5 | If a man’s AAA reaches the size of 4.5cm, he would have an assessment to see if he would be suitable for surgery should he ever need it. Men found to be unsuitable for surgery (due to not being fit/healthy enough or because the aneurysm is too extensive) would be given a choice of whether or not to stay in the surveillance programme | 21 (70%) | 26 (72%) | 23 (77%) | 28 (78%) |
| ES8 | If, after 5 years in surveillance, men with a small AAA that is not growing or is growing very slowly, can choose to exit surveillance. However, they have the option of re-entering the surveillance programme in the future if they have any concerns | 26 (87%) | 30 (83%) | 23 (77%) | 27 (75%) |
| ES 4 | After being in surveillance for 10 years, all men in the surveillance programme would have an assessment to see if they would be suitable for surgery should they ever need it. Men found to be unsuitable for surgery (due to not being fit/healthy enough or because the aneurysm is too extensive) would be given a choice of whether or not to stay in the surveillance programme | 21 (70%) | 26 (72%) | 20 (67%) | 24 (67%) |
| ES 3 | When men are first diagnosed with an AAA, before entering the surveillance programme they would have an assessment to see if they would be suitable for surgery should they ever need it. Men found to be unsuitable for surgery (due to not being fit/healthy enough or because the aneurysm is too extensive) would be given a choice of whether or not to go into the surveillance programme. | 15(50%) | 20 (56%) | 18 (60%) | 21 (58%) |
| ES6 | Each year, when attending for a scan, all men in surveillance would meet with a health care professional to discuss whether it is appropriate for them to continue in surveillance | 22 (73%) | 27 (75%) | 16 (53%) | 21 (58%) |
| ES 1 | Men in surveillance with a small AAA would be discharged from the programme after 15 yearly scans (i.e. age 80 for those first scanned at 65 years old) | 20 (67%) | 23 (64%) | 13 (43%) | 14 (39%) |
| ES 2 | Men in surveillance with a medium AAA that is not growing or is growing very slowly would be discharged from the programme after 15 years of scans (i.e. age 80 for those first scanned at 65 years old). | 12 (40%) | 13 (36%) | 11 (37%) | 12 (33%) |

**Table S5 Percentage of men and supporters strongly agreeing or agreeing with statements about how decisions should be made (N=30 men) (N=36 men and supporters)**

| Aspect | Pre-deliberation  Men  N (%) | Pre-deliberation  Men and Supporters  N (%) | Post-deliberation  Men  N (%) | Post-deliberation  Men and Supporters  N (%) |
| --- | --- | --- | --- | --- |
| Helpful to have estimate of risks of different options | 28 (93%) | 34 (94%) | 29 (97%) | 35 (97%) |
| Discuss with Nurse Specialist | 25 (83%) | 31 (86%) | 25 (83%) | 31 (86%) |
| Patient should decide | 19 (63%) | 23 (64%) | 25 (83%) | 31 (86%) |
| Family/friends involved in discussion | 21 (70%) | 27 (75%) | 22 (73%) | 28 (78%) |
| Discuss with vascular surgeon | 19 (63%) | 24 (67%) | 15 (50%) | 19 (53%) |
| Prefer to make decision myself after being provided with written information | 15 (50%) | 18 (50%) | 13 (43%) | 16 (44%) |
| Discuss with GP | 17 (57%) | 23 (64%) | 9 (30%)+ | 12 (33%) |
| Cost should be taken into account | 6 (20%) | 7 (19%) | 8 (27%) | 11 (31%) |
| Doctors and nurses should decide | 5 (17%) | 6 (17%) | 3 (10%) | 3 (8%) |

+P<0.05 McNemars’ Test

**Table S6 Percentage of men valuing different aspects of surveillance (N=30 men) (N=36 men and supporters)**

| Value about being in surveillance | Pre-deliberation  Men  N ( %) | Pre-deliberation Men and Supporters  N (%) | Post-deliberation  Men  N (%) | Post-deliberation  Men and Supporters  N (%) |
| --- | --- | --- | --- | --- |
| Value most about surveillance  Reassurance  Future surgery  Other | 18 (60%)  12 (40%)  0 (0%) | 21 (58%)  15 (42%)  0 (0%) | 20 (67%)  10 (33%)  0 (0%) | 23 (64%)  12 (33%)  1 (3%) |
| Value least about surveillance  Effort of attending  Worry when scanned  Other | 6 (20%)  12 (40%)  8 (27%) | 7 (19%)  13 (36%)  10 (28%) | 6 (20%)  11 (37%)  9 (30%) | 8 (22%)  12 (33%)  9 (25%) |
| Value being in surveillance even if cannot have surgery  Yes  No  Do not know | 24 (80%)  2 (7%)  4 (13%) | 30 (83%)  2 (6%)  4 (11%) | 17 (57%)  8 (27%)  5 (17%) | 22 (61%)  8 (22%)  5 (14%) |


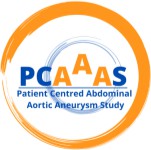

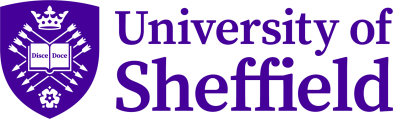


After Workshop Survey

1. **Thank you for joining in. We now want to know what you think after you have heard the talks and discussed things with other people. Most of the questions are the same as the ones you answered at the start of the workshop. You may want to give the same answers or different answers. We want to know what you think now.**
2. **Your responses will be treated as confidential and will not affect your care in any way.**

**Page 1**

**Section A. We want to understand what you know about AAA screening.**

**P*lease tick ONE box for each question in this section*.**

| **1. An abdominal aortic aneurysm (AAA) is:** |  |
| --- | --- |
| a. A weakened area in the main artery in the chest | ☐ |
| b. A weakened area in the main artery in the abdomen | ☐ |
| c. A weakened area in the main vein in the chest | ☐ |
| d. A weakened area in the main vein in the abdomen | ☐ |
| e. A growth in the abdomen | ☐ |
| f. Not sure | ☐ |
|  |  |
| **2. The diameter of the normal aorta in a man is:** |  |
| a. Less than 3 cm | ☐ |
| b. Between 3 cm and 4.5 cm | ☐ |
| c. Between 4.5 cm and 5.5 cm | ☐ |
| d. Not sure | ☐ |
| **3. A small AAA is:** |  |
| a. Less than 3 cm | ☐ |
| b. Between 3 cm and 4.4 cm | ☐ |
| c. Between 4.5 cm and 5.4 cm | ☐ |
| d. Not sure | ☐ |
| **4. A medium AAA is:** |  |
| a. Less than 3 cm | ☐ |
| b. Between 3 cm and 4.4 cm | ☐ |
| c. Between 4.5 cm and 5.4 cm | ☐ |
| d. Not sure | ☐ |
| **5. Screening for AAA is offered to:** |  |
| a. Everyone at the age of 60 | ☐ |
| b. Everyone at the age of 65 | ☐ |
| c. Everyone at the age of 70 | ☐ |
| d. Men at the age of 65, Women at the age of 60 | ☐ |
| e. Only men at the age of 65 | ☐ |
| f. Not sure | ☐ |

| **6. People with a small AAA require a scan every:** |  |
| --- | --- |
| a. 1 month | ☐ |
| b. 3 months | ☐ |
| c. 6 months | ☐ |
| d. 1 year | ☐ |
| e. 2 years | ☐ |
| f. Not sure | ☐ |
|  |  |
| **7. People with a medium size AAA require a scan every:** |  |
| a. 1 month | ☐ |
| b. 3 months | ☐ |
| c. 6 months | ☐ |
| d. 1 year | ☐ |
| e. 2 years | ☐ |
| f. Not sure | ☐ |
|  |  |
| **8. Screening for AAA is carried out with:** |  |
| a. A CT scan | ☐ |
| b. An MRI | ☐ |
| c. An ultrasound scan | ☐ |
| d. An X-ray | ☐ |
| e. Not sure | ☐ |
| **9. The current policy of the screening programme is that people who are found to have an**  **AAA will remain in the surveillance programme:** | |
| a. Indefinitely, unless the AAA needs treatment | ☐ |
| b. Until they reach 80 years of age, if AAA remains small | ☐ |
| c. Until they reach 75 years of age, if AAA remains small | ☐ |
| d. Until they are not fit enough for surgery | ☐ |
| e. Until they decide they want to leave surveillance | ☐ |
| f. Not sure | ☐ |
|  |  |
| **10. If someone’s AAA reaches 5.5 cm in diameter:** |  |
| a. They will be offered surgery to repair it | ☐ |
| b. They will be referred to a specialist for assessment, and only if they are considered fit  enough, will they be offered surgery | ☐ |
| c. They will be discharged from the surveillance programme | ☐ |
| d. Not sure | ☐ |

| **11. People with a small AAA are scanned until the aneurysm gets bigger, rather than having**  **immediate surgery because:** | |
| --- | --- |
| a. There is a waiting list for surgery | ☐ |
| b. It avoids the risk of surgery, and they may never need an operation | ☐ |
| c. Surveillance costs less than surgery | ☐ |
| d. Not sure | ☐ |

**Section B. Factors to consider in developing an Exit Strategy**

An Exit Strategy is a way for people to leave the surveillance programme and stop having scans. Exit Strategy is what the service calls it. In developing an Exit Strategy, there are many factors which could be considered. The questions in this section are about how important you think certain factors are.

***For each of the following statements, please tick ONE box to show how important you think each factor is when developing an exit strategy.***

|  | Extremely  Important | Very  Important | Moderately  important | Of little  importance | Not at all  Important |
| --- | --- | --- | --- | --- | --- |
| 1. Size of the AAA | ☐ | ☐ | ☐ | ☐ | ☐ |
| 2. Age | ☐ | ☐ | ☐ | ☐ | ☐ |
| 3. Health issues that may make  surgery more risky | ☐ | ☐ | ☐ | ☐ | ☐ |
| 4. Worry caused by being in surveillance | ☐ | ☐ | ☐ | ☐ | ☐ |
| 5. Difficulty attending for scans | ☐ | ☐ | ☐ | ☐ | ☐ |
| 6. Cost to the NHS | ☐ | ☐ | ☐ | ☐ | ☐ |
| 7. Reassurance provided by a  scan | ☐ | ☐ | ☐ | ☐ | ☐ |
| 8. What people (and their family) would prefer | ☐ | ☐ | ☐ | ☐ | ☐ |
| 9. The views of healthcare  professionals | ☐ | ☐ | ☐ | ☐ | ☐ |
| 10. Rate of growth of the AAA | ☐ | ☐ | ☐ | ☐ | ☐ |
| 11. Number of years spent in  surveillance | ☐ | ☐ | ☐ | ☐ | ☐ |

12. Other (please write down any other factors in the space below)

**Section C. Acceptability of different Exit Strategies**

***This section presents descriptions of 9 possible Exit Strategies. Please consider each strategy and tick ONE box for each strategy: -***

| 1. Men in surveillance with a small AAA would be discharged from the programme after 15  yearly scans (i.e. age 80 for those first scanned at 65 years old). | | | | |
| --- | --- | --- | --- | --- |
| Very Acceptable | Acceptable | Neither Acceptable nor Unacceptable | Unacceptable | Very Unacceptable |
| ☐ | ☐ | ☐ | ☐ | ☐ |
| 2. Men in surveillance with a medium AAA *that is not growing or is growing very slowly* would be discharged from the programme after 15 years of scans (i.e. age 80 for those first scanned  at 65 years old). | | | | |
| Very Acceptable | Acceptable | Neither Acceptable nor Unacceptable | Unacceptable | Very Unacceptable |
| ☐ | ☐ | ☐ | ☐ | ☐ |
| 3. When men are first diagnosed with an AAA, before entering the surveillance programme they would have an assessment to see if they would be suitable for surgery should they ever need it. Men found to be unsuitable for surgery (due to not being fit/healthy enough or because the aneurysm is too extensive) would be given a choice of whether or not to go into  the surveillance programme. | | | | |
| Very Acceptable | Acceptable | Neither Acceptable nor Unacceptable | Unacceptable | Very Unacceptable |
| ☐ | ☐ | ☐ | ☐ | ☐ |
| 4. After being in surveillance for 10 years, all men in the surveillance programme would have an assessment to see if they would be suitable for surgery should they ever need it. Men found to be unsuitable for surgery (due to not being fit/healthy enough or because the aneurysm is too extensive) would be given a choice of whether or not to stay in the  surveillance programme. | | | | |
| Very Acceptable | Acceptable | Neither Acceptable nor Unacceptable | Unacceptable | Very Unacceptable |
| ☐ | ☐ | ☐ | ☐ | ☐ |
| 5. If a man’s AAA reaches the size of 4.5cm, he would have an assessment to see if he would be suitable for surgery should he ever need it. Men found to be unsuitable for surgery (due to not being fit/healthy enough or because the aneurysm is too extensive) would be given a  choice of whether or not to stay in the surveillance programme. | | | | |
| Very Acceptable | Acceptable | Neither Acceptable nor Unacceptable | Unacceptable | Very Unacceptable |
| ☐ | ☐ | ☐ | ☐ | ☐ |

| 6. Each year, when attending for a scan, all men in surveillance would meet with a health care  professional to discuss whether it is appropriate for them to continue in surveillance. | | | | |
| --- | --- | --- | --- | --- |
| Very Acceptable | Acceptable | Neither Acceptable nor Unacceptable | Unacceptable | Very Unacceptable |
| ☐ | ☐ | ☐ | ☐ | ☐ |
| 7. If a man’s health becomes worse while in surveillance, this will trigger a discussion with a  specialist nurse about whether it is appropriate for him to continue in surveillance. | | | | |
| Very Acceptable | Acceptable | Neither Acceptable nor Unacceptable | Unacceptable | Very Unacceptable |
| ☐ | ☐ | ☐ | ☐ | ☐ |
| 8. If, after 5 years in surveillance, men with a small AAA that is not growing or is growing very slowly, can choose to exit surveillance. However, they have the option of re-entering the  surveillance programme in the future if they have any concerns. | | | | |
| Very Acceptable | Acceptable | Neither Acceptable nor Unacceptable | Unacceptable | Very Unacceptable |
| ☐ | ☐ | ☐ | ☐ | ☐ |
| 9. If, after 5 years in surveillance, a man’s AAA is not growing or is growing very slowly, he can choose to have a longer interval between scans (for example, have a scan every 2 years). However, if the rate of growth of his AAA increases, he can return to having more regular  scans. | | | | |
| Very Acceptable | Acceptable | Neither Acceptable nor Unacceptable | Unacceptable | Very Unacceptable |
| ☐ | ☐ | ☐ | ☐ | ☐ |
| 10. If there is an Exit Strategy that is not described above that you feel would be worth  considering, please describe it in the space below. It can be an entirely ‘new’ exit strategy or  some combination of the above strategies. | | | | |

| 11. Which of the Exit Strategies described above (including the strategy you described, if you did so) is the most acceptable to you?  *Please write down the number of the exit strategy and the reason why in the space below* |
| --- |
|  |
| 12. Which of the Exit Strategies is the least acceptable to you?  *Please write down the number of the exit strategy and the reason why in the space below* |
|  |

**Section D. How decisions should be made**

The questions in this section ask you about how you think decisions on possible Exit Strategies should be made.

***For each of the following statements, please tick ONE box.***

| 1. I would want to have my family/friends involved in any discussion about a possible Exit  Strategy | | | | |
| --- | --- | --- | --- | --- |
| Agree Strongly | Agree | Neither Agree nor Disagree | Disagree | Disagree Strongly |
| ☐ | ☐ | ☐ | ☐ | ☐ |
| 2. I would want to discuss a possible Exit Strategy with my GP | | | | |
| Agree  Strongly | Agree | Neither Agree  nor Disagree | Disagree | Disagree  Strongly |
| ☐ | ☐ | ☐ | ☐ | ☐ |

| 3. I would want to discuss a possible Exit Strategy with a Nurse Specialist from the screening  programme | | | | |
| --- | --- | --- | --- | --- |
| Agree Strongly | Agree | Neither Agree nor Disagree | Disagree | Disagree Strongly |
| ☐ | ☐ | ☐ | ☐ | ☐ |
| 4. I would want to discuss a possible Exit Strategy with a vascular surgeon | | | | |
| Agree Strongly | Agree | Neither Agree nor Disagree | Disagree | Disagree Strongly |
| ☐ | ☐ | ☐ | ☐ | ☐ |
| 5. I would prefer to make the decision myself after being provided with written information | | | | |
| Agree Strongly | Agree | Neither Agree nor Disagree | Disagree | Disagree Strongly |
| ☐ | ☐ | ☐ | ☐ | ☐ |
| 6. I would find it helpful to have an estimate of my risks for the different options | | | | |
| Agree Strongly | Agree | Neither Agree nor Disagree | Disagree | Disagree Strongly |
| ☐ | ☐ | ☐ | ☐ | ☐ |
| 7. Cost should be taken into account in decisions about possible Exit Strategies | | | | |
| Agree Strongly | Agree | Neither Agree nor Disagree | Disagree | Disagree Strongly |
| ☐ | ☐ | ☐ | ☐ | ☐ |
| 8. Doctors and nurses should make the decision about when people should exit surveillance  and just tell people | | | | |
| Agree Strongly | Agree | Neither Agree nor Disagree | Disagree | Disagree Strongly |
| ☐ | ☐ | ☐ | ☐ | ☐ |
| 9. It should be up to the patient to decide when they leave surveillance | | | | |
| Agree Strongly | Agree | Neither Agree nor Disagree | Disagree | Disagree Strongly |
| ☐ | ☐ | ☐ | ☐ | ☐ |

.

**Section E. Your views on being in surveillance for your AAA**

***For each of the following statements, please tick ONE box.***

| 1. Which aspect of being in surveillance do you value the most? |  |
| --- | --- |
| a. The reassurance gained from regular monitoring of the size and rate of growth of my  aneurysm | ☐ |
| b. The possibility that if my aneurysm becomes large it can be repaired through surgery | ☐ |
| c. Other  *If you said other, please say what it is you value the most:* | ☐ |
| ......................................................................................................................................................... | |
| 2. Which aspect of being in surveillance do you value the least? | |
| a. The effort of having to attend for regular scans | ☐ |
| b. The worry I experience each time I am scanned | ☐ |
| c. Other  *If you said other, please say what it is you value the least:* | ☐ |
| ......................................................................................................................................................... | |
| 3. Would you value being in surveillance, even if you knew that you would not be able to have  surgery? | |
| a. Yes | ☐ |
| b. No | ☐ |
| c. Don’t know | ☐ |
| *If you said yes, please say why you would still value being in surveillance:* |  |
| ................................................................................................................................................ |  |

**Section F. What did you think after the workshop today?**

***For each of the following statements, please tick ONE box: -***

| 1. How helpful did you find the workshop today? | | | | |
| --- | --- | --- | --- | --- |
| Extremely  helpful | Very helpful | Somewhat  helpful | Slightly  helpful | Not at all  helpful |
| ☐ | ☐ | ☐ | ☐ | ☐ |

| 2. Did it change your views about AAA screening and exit strategies? |
| --- |
| a. Yes ☐ |
| b. To some extent ☐ |
| c. No ☐ |

Any other comments? *please write them here.*

- Can we improve the workshop in any way?
- Can we improve the questionnaire in any way?

If you haven’t said it already, please say why it changed your views

**Thank you. We really appreciate your help today.**

**Please hand this back to someone running the workshop**
